# Supplementary material for: Polyphasic Characterization of Brucella spp. in Livestock Slaughtered from Abattoirs in Eastern Cape, South Africa
Source: MDPI journal article supplement (doi:10.3390/microorganisms12010223), 2024-01-22
Supplement: s1 [file s1]

# Polyphasic Characterization of *Brucella* spp. in Livestock Slaughtered from Abattoirs in Eastern Cape, South Africa

Koketso Desiree Mazwi <sup>1,\*</sup>, Francis Babaman Kolo <sup>1</sup>, Ishmael Festus Jaja <sup>2,3</sup>, Charles Byaruhanga <sup>1,4</sup>, Ayesha Hassim <sup>1</sup> and Henriette van Heerden <sup>1,\*</sup>

- <sup>1</sup> Department of Veterinary Tropical Diseases, Faculty of Veterinary Science, University of Pretoria, Onderstepoort 0002, South Africa; kolofrancis@hotmail.com (F.B.K.); cbyaruhanga27@yahoo.com (C.B.); ayesha.hassim@gmail.com (A.H.)
- <sup>2</sup> Department of Livestock and Pasture Science, Faculty of Science and Agriculture, University of Fort Hare, Alice 5700, South Africa; ijaja@ufh.ac.za
- <sup>3</sup> Department of Agriculture and Animal Health, University of South Africa, Roodepoort, Johannesburg 1709, South Africa
- <sup>4</sup> National Agricultural Research Organisation, Entebbe P.O. Box 259, Uganda
- \* Correspondence: desireemazwi@gmail.com (K.D.M.); henriette.vanheerden@up.ac.za (H.v.H.)

**Table S1:** Molecular and serological identification of *Brucella* spp. in livestock.

| Batch number (per collection) | Abattoirs         | Positive direct Tissue screening (ITS PCR) | Culture isolates (AMOS PCR)                                         |
|-------------------------------|-------------------|--------------------------------------------|---------------------------------------------------------------------|
| Batch 1                       | Abattoir A pigs   | 0/20                                       | -                                                                   |
|                               | Abattoir B cattle | 26/30                                      | 5 - <i>B. abortus</i>                                               |
|                               | Abattoir B sheep  | 4/20                                       | 3 – Mixed infections ( <i>B. abortus</i> and <i>B. melitensis</i> ) |
|                               | Abattoir C cattle | 7/30                                       | 7 – <i>B. abortus</i>                                               |
|                               | Abattoir D sheep  | 9/20                                       | 1 – <i>B. abortus</i>                                               |
|                               | Abattoir E cattle | 13/40                                      | 3 – <i>B. abortus</i>                                               |
|                               |                   |                                            | 1 – Mixed infections ( <i>B. abortus</i> and <i>B. melitensis</i> ) |
| Batch 2                       | Abattoir A cattle | 19/30                                      | 6 – <i>B. abortus</i>                                               |
|                               | Abattoir B cattle | 1/20                                       | 1 – Mixed infections ( <i>B. abortus</i> and <i>B. melitensis</i> ) |
|                               | Abattoir C pig    | 0/15                                       | -                                                                   |
|                               | Abattoir D cattle | 0/3                                        | -                                                                   |
|                               | Abattoir E sheep  | 15/20                                      | 10 – <i>B. abortus</i>                                              |
|                               |                   |                                            | 1 – Mixed infections ( <i>B. abortus</i> and <i>B. melitensis</i> ) |
|                               | Abattoir E cattle | 11/27                                      | 10 – <i>B. abortus</i>                                              |
| Batch 3                       |                   |                                            | 1 – Mixed infections ( <i>B. abortus</i> and <i>B. melitensis</i> ) |
|                               | Abattoir B cattle | 17/100                                     | 7- <i>B. abortus</i>                                                |
|                               | Abattoir B sheep  | 1/140                                      | 0                                                                   |
|                               | Abattoir B pig    | 0/34                                       | -                                                                   |
|                               | Abattoir E pig    | 4/16                                       | 1 – <i>B. abortus</i>                                               |
|                               |                   |                                            | 1 – Mixed infections ( <i>B. abortus</i> and <i>B. melitensis</i> ) |

\*The numbers in this table represent carcasses

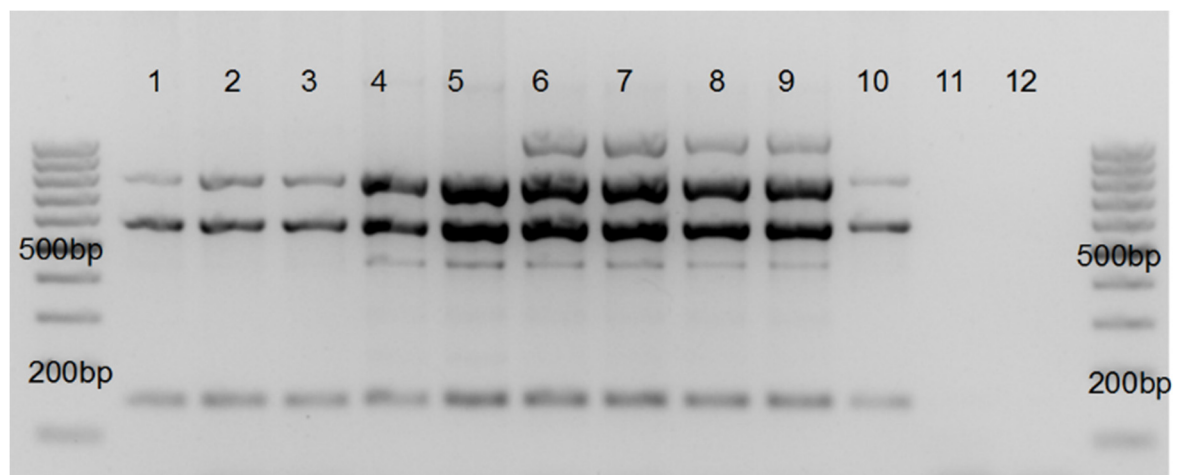

**Figure S1:** Gel electrophoresis of Bruce-Ladder PCR amplification to differentiate the field strains. Lanes 1-5 and 10 show amplification of *B. abortus*, lanes 6-8 show amplification OF *B. melitensis*, lane 9 show Rev 1 positive and lane 11 and 12 show negative controls.
